# Supplementary material
Source: Springer Nature journal article supplement (https://www.springermedizin.de/resource/supplementary/12933_2012_568_MOESM1_ESM.pdf/9538456)

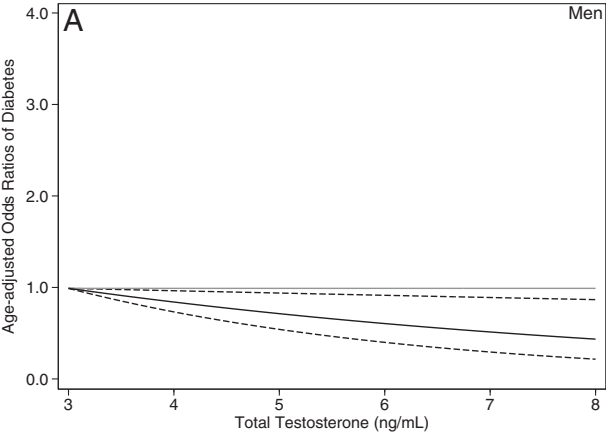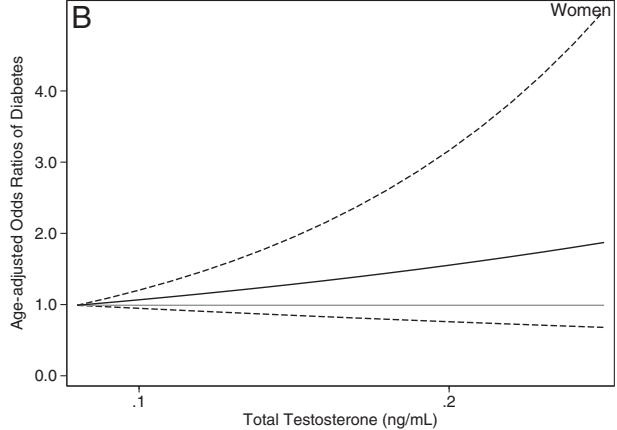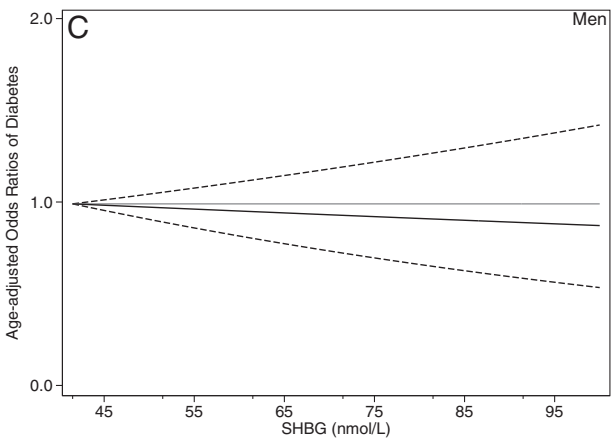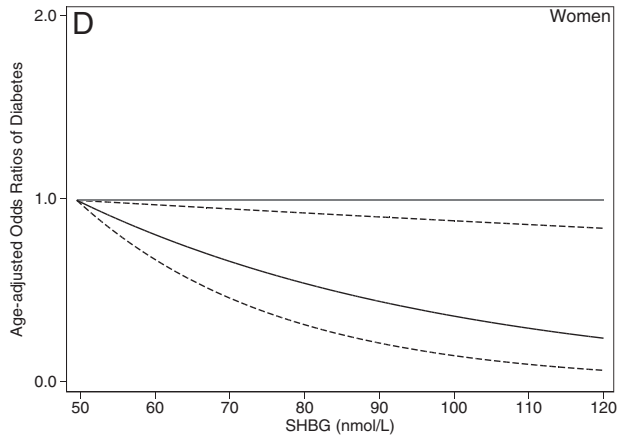

Supplement: MOESM1 [file 9538456]
